# Supplementary material for: COVID-19 Preparedness and Perceived Safety in 138 Nursing Homes in Southern Portugal: A Cross-sectional Survey-based Study in the Initial Phases of the Pandemic
Source: Preprints.org preprint supplement (doi:10.20944/preprints202106.0255.v1), 2021-06-09
Supplement: Supplementary file 6 [file supplementary]

## Supplementary File 4

Nursing home COVID-19 preparedness checklist compliance scores (breakdowns)

| Item                                           | Description                                                                                                                                                                                             | Algarve<br>(n=51) |     | Alentejo<br>(n=87) |     | Total<br>(n=138) |     |
|------------------------------------------------|---------------------------------------------------------------------------------------------------------------------------------------------------------------------------------------------------------|-------------------|-----|--------------------|-----|------------------|-----|
|                                                |                                                                                                                                                                                                         | n                 | %   | n                  | %   | n                | %   |
| 2   Structure for planning and decision making |                                                                                                                                                                                                         |                   |     |                    |     |                  |     |
| 2.1.                                           | Response to COVID-19 has been incorporated into emergency management planning for the facility                                                                                                          | 29                | 57% | 64                 | 74% | 93               | 67% |
| 2.2.                                           | A multidisciplinary planning team has been created to specifically address COVID-19 preparedness planning and monitoring                                                                                | 31                | 61% | 63                 | 72% | 94               | 68% |
| 2.3.                                           | A COVID-19 response coordinator has been assigned                                                                                                                                                       | 41                | 80% | 80                 | 92% | 121              | 88% |
| 3   COVID-19 contingency plan                  |                                                                                                                                                                                                         |                   |     |                    |     |                  |     |
| 3.1.                                           | There is a contingency plan in place that introduces mechanisms to protect the health of users, professionals and potential visitors                                                                    | 43                | 84% | 78                 | 90% | 121              | 88% |
| 3.2.                                           | A copy of the COVID-19 contingency plan is easily available at the facility and accessible by personnel                                                                                                 | 36                | 71% | 82                 | 94% | 118              | 86% |
| 3.3.                                           | A COVID-19 information monitoring mechanism is available for continuously update of the contingency plan (for example, guidelines from the Directorate-General of Health)                               | 40                | 78% | 74                 | 85% | 114              | 83% |
| 3.4.                                           | The plan identifies the person(s) authorized to implement the plan and the management, monitoring and evaluation structure that will be used                                                            | 35                | 69% | 69                 | 79% | 104              | 75% |
| 4   Elements of a COVID-19 plan                |                                                                                                                                                                                                         |                   |     |                    |     |                  |     |
| 4.1. General                                   |                                                                                                                                                                                                         |                   |     |                    |     |                  |     |
| 4.1.1.                                         | A person has been assigned responsibility for monitoring information set forth by the competent public health authorities and updating the COVID-19 response coordinator in the facility                | 46                | 90% | 77                 | 89% | 123              | 89% |
| 4.1.2.                                         | The facility has a process for inter-facility transfers that includes notifying personnel and receiving facilities about a resident's suspected or confirmed diagnosis                                  | 28                | 55% | 56                 | 64% | 84               | 61% |
| 4.1.3.                                         | The facility has a system for monitoring the evolution of COVID-19 among residents and personnel in the facility. Information from this monitoring system is used to implement prevention interventions | 39                | 76% | 56                 | 64% | 95               | 69% |

| Item                          | Description                                                                                                                                                                                                        | Algarve<br>(n=51) |     | Alentejo<br>(n=87) |     | Total<br>(n=138) |     |
|-------------------------------|--------------------------------------------------------------------------------------------------------------------------------------------------------------------------------------------------------------------|-------------------|-----|--------------------|-----|------------------|-----|
|                               |                                                                                                                                                                                                                    | n                 | %   | n                  | %   | n                | %   |
| 4.1.4.                        | The facility has infection control policies that outline the precautions recommended to residents and personnel, including the dissemination of information and use of specific signs (e.g., posters and leaflets) | 44                | 86% | 79                 | 91% | 123              | 89% |
| 4.1.5.                        | A mechanism for updating the COVID-19 response plan is well defined, including any deadlines                                                                                                                       | 20                | 39% | 49                 | 56% | 69               | 50% |
| <b>4.2. Outbreak capacity</b> |                                                                                                                                                                                                                    |                   |     |                    |     |                  |     |
| 4.2.1.                        | A contingency personnel plan has been developed that identifies the minimum personnel needs and prioritizes essential services based on residents' characteristics (e.g., functional limitations)                  | 32                | 63% | 65                 | 75% | 97               | 70% |
| 4.2.2.                        | A person has been assigned responsibility for a daily assessment and monitoring of personnel status and needs during a COVID-19 outbreak                                                                           | 39                | 76% | 72                 | 83% | 111              | 80% |
| 4.2.3.                        | Estimates have been made of the quantities of materials and equipment that would be needed during a minimum four-week outbreak                                                                                     | 32                | 63% | 66                 | 76% | 98               | 71% |
| 4.2.4.                        | A rationing strategy has been developed for Personal Protective Equipment (PPE), medicines and other scarce materials                                                                                              | 34                | 67% | 70                 | 80% | 104              | 75% |
| 4.2.5.                        | A contingency plan has been developed for managing an increased need for postmortem care and disposition of deceased residents                                                                                     | 9                 | 18% | 26                 | 30% | 35               | 25% |
| 4.2.6.                        | An area in the facility that could be used as a temporary morgue has been identified                                                                                                                               | 11                | 22% | 27                 | 31% | 38               | 28% |
| 4.2.7.                        | Any plan for expanding the morgue capacity plan been discussed and decided with the competent authorities                                                                                                          | 4                 | 8%  | 9                  | 10% | 13               | 9%  |
| <b>4.3. Communication</b>     |                                                                                                                                                                                                                    |                   |     |                    |     |                  |     |
| 4.3.1.                        | Key public health points of contact during the stages of the COVID-19 pandemic have been identified                                                                                                                | 44                | 86% | 75                 | 86% | 119              | 86% |
| 4.3.2.                        | Communication plans include how visitors should be informed about the importance of monitoring symptoms for 14 days after visiting the facility                                                                    | 37                | 73% | 47                 | 54% | 84               | 61% |
| 4.3.3.                        | A person has been assigned responsibility for communications with personnel, residents and their families regarding the status, preparedness and impact of COVID-19 in the facility                                | 45                | 88% | 80                 | 92% | 125              | 91% |
| 4.3.4.                        | Contact information and communication channels for family members of facility residents are up to date and fully disseminated                                                                                      | 47                | 92% | 78                 | 90% | 125              | 91% |

| Item                               | Description                                                                                                                                                                  | Algarve<br>(n=51) |     | Alentejo<br>(n=87) |     | Total<br>(n=138) |     |
|------------------------------------|------------------------------------------------------------------------------------------------------------------------------------------------------------------------------|-------------------|-----|--------------------|-----|------------------|-----|
|                                    |                                                                                                                                                                              | n                 | %   | n                  | %   | n                | %   |
| 4.3.5.                             | Communication plans include how signs and other methods of communication will be used across the facility                                                                    | 30                | 59% | 57                 | 66% | 87               | 63% |
| <b>4.4. Supplies and resources</b> |                                                                                                                                                                              |                   |     |                    |     |                  |     |
| 4.4.1.                             | A written and detailed plan for regular cleaning and disinfection of the facility has been developed                                                                         | 33                | 65% | 61                 | 70% | 94               | 68% |
| 4.4.2.                             | The cleaning and disinfection of the facility is ensured by a specialized company whenever confirmed cases are reported                                                      | 8                 | 16% | 32                 | 37% | 40               | 29% |
| 4.4.3                              | The cleaning and disinfection products used at the facility adhere to recommended standards                                                                                  | 47                | 92% | 82                 | 94% | 129              | 93% |
| 4.4.4.                             | All cleaning and disinfection products in use at the facility are well described in the cleaning and disinfection plan, and they are properly labeled, packaged and stored   | 37                | 73% | 65                 | 75% | 102              | 74% |
| 4.4.5.                             | The facility has access to disinfectant that is suitable for hospital use for cleaning the surfaces and equipment                                                            | 37                | 73% | 78                 | 90% | 115              | 83% |
| 4.4.6.                             | A regular cleaning and disinfection plan for bedpans, urinals and toilet bowls for residents with suspected or confirmed infection has been included in the plan             | 36                | 71% | 65                 | 75% | 101              | 73% |
| 4.4.7                              | The cleaning and disinfection of the most frequently used surfaces (e.g., tables and chairs) has been included in the plan                                                   | 43                | 84% | 76                 | 87% | 119              | 86% |
| 4.4.8.                             | The cleaning and disinfection of shared equipment (e.g., thermometers) has been included in the plan                                                                         | 46                | 90% | 77                 | 89% | 123              | 89% |
| 4.4.9.                             | The cleaning and washing of potentially contaminated clothing have been included in the plan (40°C for heat sensitive and 60°C for heat resistant)                           | 45                | 88% | 71                 | 82% | 116              | 84% |
| 4.4.10                             | A procedure has been developed for personnel to remove their work clothes after the workday                                                                                  | 40                | 78% | 70                 | 80% | 110              | 80% |
| 4.4.11                             | Cleaning plan includes a process for waste disposal, including personal protective equipment (PPE) and diapers (biohazard waste)                                             | 28                | 55% | 56                 | 64% | 84               | 61% |
| 4.4.12                             | Alcohol-based hand sanitizer for hand hygiene is available in every resident room (inside and out), other common areas and hallways                                          | 46                | 90% | 81                 | 93% | 127              | 92% |
| 4.4.13                             | Sinks are well-stocked with soap and paper towels for hand washing                                                                                                           | 49                | 96% | 85                 | 98% | 134              | 97% |
| 4.4.14                             | Signs about procedures to prevent the dissemination of infection are available throughout the facility (e.g. respiratory etiquette, hand washing, air renewal every 6 hours) | 43                | 84% | 84                 | 97% | 127              | 92% |

| Item                               | Description                                                                                                                                                                                                            | Algarve<br>(n=51) |     | Alentejo<br>(n=87) |     | Total<br>(n=138) |     |
|------------------------------------|------------------------------------------------------------------------------------------------------------------------------------------------------------------------------------------------------------------------|-------------------|-----|--------------------|-----|------------------|-----|
|                                    |                                                                                                                                                                                                                        | n                 | %   | n                  | %   | n                | %   |
| 4.4.15                             | The facility provides tissues and facemasks for coughing people (residents and personnel) in common areas with no-touch receptacles for disposal                                                                       | 44                | 86% | 83                 | 95% | 127              | 92% |
| 4.4.16                             | Necessary personal protective equipment (PPE) is available outside of the resident room and in other areas where resident care is provided                                                                             | 37                | 73% | 81                 | 93% | 118              | 86% |
| 4.4.17                             | The facility has a process to monitor supply levels (e.g. PPE and disinfectant products)                                                                                                                               | 36                | 71% | 70                 | 80% | 106              | 77% |
| 4.4.18                             | The facility has ensured in the contingency plan processes that could be triggered when they experience supply shortages (PPE and disinfectant products)                                                               | 16                | 31% | 45                 | 52% | 61               | 44% |
| <b>4.5. Education and training</b> |                                                                                                                                                                                                                        |                   |     |                    |     |                  |     |
| 4.5.1                              | A person has been designated with responsibility for coordinating education and training on COVID-19                                                                                                                   | 32                | 63% | 57                 | 66% | 89               | 64% |
| 4.5.2.1                            | An education and training plan has been developed to prevent new cases of coronavirus infection; the target population of this education and training plan are the facility's personnel                                | 32                | 63% | 59                 | 68% | 91               | 66% |
| 4.5.2.2                            | An education and training plan has been developed to prevent new cases of coronavirus infection; the target population of this education and training plan are the facility's external collaborators                   | 16                | 31% | 27                 | 31% | 43               | 31% |
| 4.5.2.3                            | An education and training plan has been developed to prevent new cases of coronavirus infection; the target population of this education and training plan are the new staff hired to bolster the facility's personnel | 24                | 47% | 30                 | 34% | 54               | 39% |
| 4.5.2.4                            | An education and training plan has been developed to prevent new cases of coronavirus infection; the target population of this education and training plan are volunteers                                              | 16                | 31% | 20                 | 23% | 36               | 26% |
| 4.5.2.5                            | An education and training plan has been developed to prevent new cases of coronavirus infection; the target population of this education and training plan are the health professionals at the facility                | 31                | 61% | 57                 | 66% | 88               | 64% |
| 4.5.2.6                            | An education and training plan has been developed to prevent new cases of coronavirus infection; the target population of this education and training plan are the residents                                           | 30                | 59% | 44                 | 51% | 74               | 54% |
| 4.5.2.7                            | An education and training plan has been developed to prevent new cases of coronavirus infection; the target population of this education and training plan are the family members and visitors                         | 15                | 29% | 27                 | 31% | 42               | 30% |

| Item                            | Description                                                                                                                                                          | Algarve<br>(n=51) |     | Alentejo<br>(n=87) |     | Total<br>(n=138) |     |
|---------------------------------|----------------------------------------------------------------------------------------------------------------------------------------------------------------------|-------------------|-----|--------------------|-----|------------------|-----|
|                                 |                                                                                                                                                                      | n                 | %   | n                  | %   | n                | %   |
| 4.5.3                           | Any training and awareness materials have been developed taking into consideration the characteristics of the target audience (e.g., reading-level, health literacy) | 17                | 33% | 37                 | 43% | 54               | 39% |
| 4.5.4                           | The facility keeps a record of all education and training activities related with the adequate use of personal protective equipment (PPE)                            | 21                | 41% | 37                 | 43% | 58               | 42% |
| <b>4.6. Occupational health</b> |                                                                                                                                                                      |                   |     |                    |     |                  |     |
| 4.6.1                           | The facility has sick leave policies that are non-punitive and consistent with public health policies that allow personnel to stay home in case of need              | 39                | 76% | 67                 | 77% | 106              | 77% |
| 4.6.2                           | The facility has developed a plan for the distribution and rotation of work schedules among personnel (e.g., 14-day at work rotation)                                | 27                | 53% | 65                 | 75% | 92               | 67% |
| 4.6.3                           | The facility instructs the personnel to regularly monitor themselves for any symptoms related with coronavirus infection                                             | 46                | 90% | 77                 | 89% | 123              | 89% |
| 4.6.4                           | The facility has a process to actively screen residents and their family members/visitors for any symptoms related with coronavirus infection                        | 47                | 92% | 73                 | 84% | 120              | 87% |
| 4.6.5                           | The facility has a process for actively screen personnel for symptoms of a coronavirus infection when they report to work                                            | 42                | 82% | 64                 | 74% | 106              | 77% |
| 4.6.6                           | The facility has a process for actively screen personnel for symptoms of a coronavirus infection at the end of the workday                                           | 35                | 69% | 55                 | 63% | 90               | 65% |
| 4.6.7                           | The personnel was involved in decision-making on matters that directly or indirectly affect their routine practice, and the regular work processes and procedures    | 44                | 86% | 78                 | 90% | 122              | 88% |
| 4.6.8                           | The facility has a process to monitor the implementation and the effects of measures implemented in the facility to prevent potential contagion situations           | 30                | 59% | 60                 | 69% | 90               | 65% |
| 4.6.9.1                         | The measures in force in the facility imply that common spaces are only used by residents and personnel without symptoms of (acute) respiratory infection            | 43                | 84% | 72                 | 83% | 115              | 83% |
| 4.6.9.2                         | The measures in force in the facility imply a physical distance of at least 1.5 meters between people                                                                | 37                | 73% | 63                 | 72% | 100              | 72% |
| 4.6.9.3                         | The measures in force in the facility imply the use of common spaces to be done in shifts, including meal periods.                                                   | 34                | 67% | 54                 | 62% | 88               | 64% |

| Item                                                       | Description                                                                                                                                                                                      | Algarve<br>(n=51) |     | Alentejo<br>(n=87) |     | Total<br>(n=138) |     |
|------------------------------------------------------------|--------------------------------------------------------------------------------------------------------------------------------------------------------------------------------------------------|-------------------|-----|--------------------|-----|------------------|-----|
|                                                            |                                                                                                                                                                                                  | n                 | %   | n                  | %   | n                | %   |
| 4.6.9.4                                                    | The measures in force in the facility imply the provision of beds spaced at least 1.5 meters apart                                                                                               | 34                | 67% | 56                 | 64% | 90               | 65% |
| 4.6.9.5                                                    | The measures in force in the facility imply that suspected COVID-19 cases do not share the same space of confirmed cases                                                                         | 41                | 80% | 75                 | 86% | 116              | 84% |
| 4.6.9.6                                                    | The measures in force in the facility imply that suspected or confirmed COVID-19 cases do not share common spaces with fellow residents and personnel                                            | 38                | 75% | 76                 | 87% | 114              | 83% |
| 4.6.9.7                                                    | The measures in force in the facility foresee the possibility of transferring residents to other facilities (e.g., hotel)                                                                        | 12                | 24% | 30                 | 34% | 42               | 30% |
| 4.6.9.8                                                    | The measures in force in the facility imply restriction or cancellation of group activities                                                                                                      | 48                | 94% | 81                 | 93% | 129              | 93% |
| 4.6.9.9                                                    | The measures in force in the facility imply the provision of means of contact so that residents can communicate with family members                                                              | 48                | 94% | 84                 | 97% | 132              | 96% |
| <b>4.7. Identification and management of ill residents</b> |                                                                                                                                                                                                  |                   |     |                    |     |                  |     |
| 4.7.1                                                      | The facility has developed a plan for isolating suspected or confirmed cases of coronavirus infection                                                                                            | 46                | 90% | 82                 | 94% | 128              | 93% |
| 4.7.2                                                      | The plan includes the processes and procedures on how to immediately notify the competent authorities on suspected cases of coronavirus infection                                                | 47                | 92% | 81                 | 93% | 128              | 93% |
| 4.7.3.1                                                    | The admission process for new residents has been revised and requires a negative laboratory test for SARS-CoV-2                                                                                  | 45                | 88% | 69                 | 79% | 114              | 83% |
| 4.7.3.2                                                    | The admission process for new residents has been revised and requires that all new residents show no signs and symptoms of respiratory infection                                                 | 44                | 86% | 65                 | 75% | 109              | 79% |
| 4.7.3.3                                                    | The admission process for new residents has been revised and requires a mandatory isolation period of 14 days (minimum)                                                                          | 45                | 88% | 71                 | 82% | 116              | 84% |
| 4.7.4                                                      | The facility has developed a plan for when a resident leaves the institution for less than 24 hours (e.g., isolation period of at least 14 days)                                                 | 44                | 86% | 63                 | 72% | 107              | 78% |
| 4.7.5                                                      | The facility has developed a plan for when a resident leaves the institution for more than 24 hours (e.g., laboratory test for SARS-CoV-2)                                                       | 41                | 80% | 63                 | 72% | 104              | 75% |
| <b>4.8. Access control</b>                                 |                                                                                                                                                                                                  |                   |     |                    |     |                  |     |
| 4.8.1                                                      | The institution has developed or used materials at all entrances to signal access restriction to the facility to all individuals with febrile symptoms or with symptoms of respiratory infection | 42                | 82% | 60                 | 69% | 102              | 74% |

| Item    | Description                                                                                                                                                                     | Algarve<br>(n=51) |     | Alentejo<br>(n=87) |     | Total<br>(n=138) |     |
|---------|---------------------------------------------------------------------------------------------------------------------------------------------------------------------------------|-------------------|-----|--------------------|-----|------------------|-----|
|         |                                                                                                                                                                                 | n                 | %   | n                  | %   | n                | %   |
| 4.8.2   | The facility has developed a plan for non-essential visits and where potential restrictions apply, those affected were informed                                                 | 42                | 82% | 79                 | 91% | 121              | 88% |
| 4.8.3.1 | The facility has developed a plan to handle supplier that require access to the interior of the facility                                                                        | 41                | 80% | 68                 | 78% | 109              | 79% |
| 4.8.3.2 | The facility has developed a plan to handle suppliers that do not require access to the interior of the facility, and thus, a (un)loading area was defined outside the facility | 45                | 88% | 78                 | 90% | 123              | 89% |
