# Supplementary material for: COVID-19 Preparedness and Perceived Safety in 138 Nursing Homes in Southern Portugal: A Cross-sectional Survey-based Study in the Initial Phases of the Pandemic
Source: Preprints.org preprint supplement (doi:10.20944/preprints202106.0255.v1), 2021-06-09
Supplement: Supplementary file 9 [file supplementary]

## Supplementary File 6

### Explorative Factor Analysis: factor loadings and communalities, and scale items' reliability

Solutions for two and three factors were each examined using a principal axis factor analysis with varimax and oblimin rotations of the factor loading matrix. A total of two items were excluded (item 4 and 6) given their Kaiser-Meyer-Olkin (KMO) measure of sampling adequacy and having failed to meet the criteria of having a primary factor loading and no cross-loading of 0.3 or above. An oblimin rotation provided the best factor structure and met all relevant assumption criteria (determinant = 0.02; overall KMO = 0.798; KMO for individual items greater than 0.75; Bartlett's sphericity p-value <0.001). Two factors were retained, which combined explained 69% of the variance. Factor 1, which we labelled as *Fear attributed to COVID-19*, was comprised of 4 items that accounted for 43.9% of the variance with factor loading from - 0.047 to 0.916 and a Cronbach's  $\alpha = 0.838$ . The other factor was that of *Absenteeism attributed to COVID-19*, which was comprised of 4 items that accounted for 24.8% of the variance and showed a Cronbach's  $\alpha = 0.854$ . Overall, after excluding two items for low adequacy sampling, the 8-item scale showed a reliability of 0.811 and a correlation of 0.336 among fear and absenteeism attributed to COVID-19.

Factor loading and communalities based on a principal axis factoring with oblimin rotation (N=599), and scale items' reliability.

| Item                                                                                                             | Rotated factor loading |         | Communalities | Reliability            |                                     |
|------------------------------------------------------------------------------------------------------------------|------------------------|---------|---------------|------------------------|-------------------------------------|
|                                                                                                                  | 1                      | 2       |               | Item-total correlation | Cronbach's $\alpha$ if item deleted |
| Factor 1: Fear attributed to COVID-19 (Cronbach's $\alpha_{N=677} = 0.838$ )                                     |                        |         |               |                        |                                     |
| Staff have felt fear of becoming infected with the virus that causes COVID-19 because of their job-related tasks | 0.794                  | 0.029   | 0.646         | 0.731                  | 0.765                               |
| Staff have felt fear of infecting nursing home residents or colleagues while at work                             | 0.916                  | − 0.056 | 0.807         | 0.775                  | 0.745                               |
| Staff have felt fear of infecting their family members                                                           | 0.873                  | − 0.063 | 0.728         | 0.751                  | 0.757                               |
| Staff have been filled with anxiety because of the use of personal protective equipment at work                  | 0.455                  | 0.075   | 0.235         | 0.443                  | 0.888                               |
| Factor 2: Absenteeism attributed to COVID-19 (Cronbach's $\alpha_{N=617} = 0.854$ )                              |                        |         |               |                        |                                     |
| Staff have been missing work out of fear of becoming infected with the virus that causes COVID-19                | − 0.014                | 0.799   | 0.630         | 0.709                  | 0.799                               |
| Staff have been missing work out of fear of infecting people at their household                                  | − 0.047                | 0.877   | 0.744         | 0.756                  | 0.778                               |
| Staff have been missing work because they were recommended to stay at home in quarantine                         | − 0.026                | 0.767   | 0.575         | 0.706                  | 0.800                               |
| Staff have been missing work to provide assistance to family members (e.g. taking care of children)              | 0.100                  | 0.608   | 0.421         | 0.598                  | 0.854                               |
| Eigenvalue                                                                                                       | 3.513                  | 1.981   |               |                        |                                     |
| % of total variance                                                                                              | 43.9%                  | 24.8%   |               |                        |                                     |
| Correlation among factors                                                                                        | 0.336                  |         |               |                        |                                     |
| 8-item Cronbach's $\alpha$                                                                                       | 0.811                  |         |               |                        |                                     |
