# Supplementary material for: COVID-19 Preparedness and Perceived Safety in 138 Nursing Homes in Southern Portugal: A Cross-sectional Survey-based Study in the Initial Phases of the Pandemic
Source: Preprints.org preprint supplement (doi:10.20944/preprints202106.0255.v1), 2021-06-09
Supplement: Supplementary file 11 [file supplementary]

## Supplementary File 5

Key underdeveloped COVID-19 preparedness checklist items and good practices among nursing homes

| COVID-19 preparedness categories                          | Common underdeveloped items                                                                                                                                                                                                                                                                                                                                            | Identification of good practices                                                                                                                                                                                                                                                                                                                                                                                     |
|-----------------------------------------------------------|------------------------------------------------------------------------------------------------------------------------------------------------------------------------------------------------------------------------------------------------------------------------------------------------------------------------------------------------------------------------|----------------------------------------------------------------------------------------------------------------------------------------------------------------------------------------------------------------------------------------------------------------------------------------------------------------------------------------------------------------------------------------------------------------------|
| <b>Structure for planning and decision making</b>         | <ul style="list-style-type: none"> <li>▪ Insufficient multidisciplinary governance structure.</li> <li>▪ Governance structure not clearly defined.</li> </ul>                                                                                                                                                                                                          | <ul style="list-style-type: none"> <li>▪ Governance structure for planning and decision-making includes the nursing home director, clinical director, technical director, health care professional (nurses and a psychologist) and a social worker.</li> <li>▪ Maintenance of an up-to-date emergency contact list, listing relevant regional and local health and other competent authorities' contacts.</li> </ul> |
| <b>Development of a written COVID-19 contingency plan</b> | <ul style="list-style-type: none"> <li>▪ Underdeveloped contingency plan (e.g., insufficient planning on how to deal in case of a confirmed or suspicious case).</li> <li>▪ Unawareness of the existence of a contingency plan and its details by key stakeholders (e.g., nursing home personnel).</li> <li>▪ No periodic revision of the contingency plan.</li> </ul> | <ul style="list-style-type: none"> <li>▪ The contingency plan is continuously revised based on the guidelines of the Directorate-General of Health and other relevant competent authorities.</li> <li>▪ Access-restricted WhatsApp channel to share and discuss aspects of the contingency plan (e.g., updates based on novel Directorate-General of Health guidelines).</li> </ul>                                  |
| <b>General aspects of a COVID-19 plan</b>                 | <ul style="list-style-type: none"> <li>▪ Poor planning to isolate and/or transfer residents, if needed.</li> <li>▪ Poor surveillance mechanisms to monitor symptoms among residents and staff that could signal an eventual coronavirus infection.</li> </ul>                                                                                                          | <ul style="list-style-type: none"> <li>▪ Clear identification of a key person responsible for monitoring guideline updates and relaying it to the governance team.</li> <li>▪ Designation of a shift team leader responsible of activating emergency mechanisms foreseen in the contingency plan.</li> </ul>                                                                                                         |

| COVID-19 preparedness categories | Common underdeveloped items                                                                                                                                                                                                                                                                                                                                          | Identification of good practices                                                                                                                                                                                                                                                                             |
|----------------------------------|----------------------------------------------------------------------------------------------------------------------------------------------------------------------------------------------------------------------------------------------------------------------------------------------------------------------------------------------------------------------|--------------------------------------------------------------------------------------------------------------------------------------------------------------------------------------------------------------------------------------------------------------------------------------------------------------|
| <b>Outbreak capacity</b>         | <ul style="list-style-type: none"> <li>▪ Insufficient planning addressing infrastructure constraints (e.g., insufficient space for isolation rooms).</li> <li>▪ Insufficient planning to overcome absenteeism hurdles.</li> <li>▪ Insufficient planning to overcome financial and market availability constraints to personal protective equipment (PPE).</li> </ul> | <ul style="list-style-type: none"> <li>▪ Having an emergency protocol with the nearest primary health care centers to be activated in the case of an outbreak.</li> </ul>                                                                                                                                    |
| <b>Facility communications</b>   | <ul style="list-style-type: none"> <li>▪ Inadequate communication with families and carers, including the monitoring of symptoms when these people still had access to the facilities.</li> <li>▪ Flawed communication channels with health and other competent authorities.</li> </ul>                                                                              | <ul style="list-style-type: none"> <li>▪ The use of social media and other platforms for updating families and carers on the nursing home's planning and initiatives to mitigate the effects of the pandemic.</li> </ul>                                                                                     |
| <b>Supplies and resources</b>    | <ul style="list-style-type: none"> <li>▪ Insufficient detail of the cleaning plan and inexistence of written records to keep track of cleaned areas.</li> <li>▪ Generalized shortage of specific PPE (e.g., gowns and FFP2 masks)</li> <li>▪ Improper use and handling of PPE.</li> </ul>                                                                            | <ul style="list-style-type: none"> <li>▪ Contracting of a professional cleaning services with biohazard waste collection in case of positive cases of COVID-19.</li> <li>▪ Systematic inventory and maintenance of sufficient stock of PPE, in close collaboration with governmental authorities.</li> </ul> |
| <b>Education and training</b>    | <ul style="list-style-type: none"> <li>▪ No specific education and training planning, with clear focus and objectives, and towards the needs of different audiences</li> </ul>                                                                                                                                                                                       | <ul style="list-style-type: none"> <li>▪ Identification and training of experienced volunteers who could be called upon a shortage of personnel.</li> <li>▪ Training programmes conceptualized and implemented by experienced trainers with adequate certification.</li> </ul>                               |

| COVID-19 preparedness categories                      | Common underdeveloped items                                                                                                                                                                                                                                                                                                                                                                                                                                                                                                            | Identification of good practices                                                                                                                                                                                                                                                        |
|-------------------------------------------------------|----------------------------------------------------------------------------------------------------------------------------------------------------------------------------------------------------------------------------------------------------------------------------------------------------------------------------------------------------------------------------------------------------------------------------------------------------------------------------------------------------------------------------------------|-----------------------------------------------------------------------------------------------------------------------------------------------------------------------------------------------------------------------------------------------------------------------------------------|
| <b>Occupational health</b>                            | <ul style="list-style-type: none"> <li>▪ Inexistence of a monitoring system to assess the implementation and effects of measures at the institutional and individual level (residents and personnel), such as the implementation of 14-day rotating shifts among personnel and the cancellation of all visiting hours.</li> <li>▪ Clean/unclean circuits lack detail and are not well signaled throughout the facility.</li> <li>▪ Nonpunitive culture regarding leaves off of work are overlooked in the contingency plan.</li> </ul> | <ul style="list-style-type: none"> <li>▪ Family or carers visits were adapted on top of taking into consideration Directorate-General of Health guidelines regarding visits and visitors (e.g., building of an adapted wall of plastic which allows hugging)</li> </ul>                 |
| <b>Identification and management of ill residents</b> | <ul style="list-style-type: none"> <li>▪ Non-compliance with criteria admission for new residents.</li> <li>▪ Insufficient planning to accommodate the necessary travelling of residents to receive specialized care elsewhere.</li> </ul>                                                                                                                                                                                                                                                                                             | <ul style="list-style-type: none"> <li>▪ Activation of an emergency plan to relocate non-infected residents to a closed private hotel facility and manage the health of infected residents inside the nursing home facilities.</li> </ul>                                               |
| <b>Access to facilities</b>                           | <ul style="list-style-type: none"> <li>▪ Lack of visual cues and information across the institution (including at the entrance).</li> <li>▪ Insufficient planning on how to deal with external service providers that need access to the interior of the facility.</li> </ul>                                                                                                                                                                                                                                                          | <ul style="list-style-type: none"> <li>▪ Definition of new processes regarding goods supplies (e.g., orders are placed via e-mail, goods are delivered in a designated outside area, and goods are disinfected prior taken in; invoices are digital instead of paper-based).</li> </ul> |
