# Supplementary material for: COVID-19 Preparedness and Perceived Safety in 138 Nursing Homes in Southern Portugal: A Cross-sectional Survey-based Study in the Initial Phases of the Pandemic
Source: Preprints.org preprint supplement (doi:10.20944/preprints202106.0255.v1), 2021-06-09
Supplement: Supplementary file 12 [file supplementary]

# Supplementary File 1

## Nursing home COVID-19 preparedness checklist

### 1. Characterization of the Institution

|                                                                                                        |       |                             |                           |                            |                  |                                             |
|--------------------------------------------------------------------------------------------------------|-------|-----------------------------|---------------------------|----------------------------|------------------|---------------------------------------------|
| Name                                                                                                   |       |                             |                           |                            |                  |                                             |
| Respondent's name                                                                                      |       |                             |                           |                            | Date             |                                             |
| No. bedrooms                                                                                           |       | Laundry                     |                           | No. interior leisure space |                  |                                             |
|                                                                                                        |       | Rest areas for personnel    |                           | No. outdoor leisure space  |                  |                                             |
| <b>Residents</b>                                                                                       |       |                             |                           |                            |                  |                                             |
|                                                                                                        | Total | Autonomous                  | Bedridden                 | In wheelchair              | Reduced mobility | How many could be hosted by family members? |
| No. men                                                                                                |       |                             |                           |                            |                  |                                             |
| No. women                                                                                              |       |                             |                           |                            |                  |                                             |
| No. positive for COVID-19:                                                                             |       | No. prophylactic isolation: |                           | Reason(s):                 |                  |                                             |
| <b>Personnel</b>                                                                                       |       |                             |                           |                            |                  |                                             |
|                                                                                                        | Total | Positive for COVID-19       | In prophylactic isolation |                            | Reason(s)        |                                             |
| Internal                                                                                               |       |                             |                           |                            |                  |                                             |
| External                                                                                               |       |                             |                           |                            |                  |                                             |
| Brief description of absenteeism among internal professionals and implications to the contingency plan |       |                             |                           |                            |                  |                                             |

| 2. Structure for planning and decision making                                                                             |                         | Completed                | In progress              | Not initiated            |
|---------------------------------------------------------------------------------------------------------------------------|-------------------------|--------------------------|--------------------------|--------------------------|
| Response to COVID-19 has been incorporated into emergency management planning for the facility.                           |                         | <input type="checkbox"/> | <input type="checkbox"/> | <input type="checkbox"/> |
| Date of last update:                                                                                                      |                         |                          |                          |                          |
| A multidisciplinary planning team has been created to specifically address COVID-19 preparedness planning and monitoring. |                         | <input type="checkbox"/> | <input type="checkbox"/> | <input type="checkbox"/> |
| A COVID-19 response coordinator has been assigned.                                                                        |                         | <input type="checkbox"/> | <input type="checkbox"/> | <input type="checkbox"/> |
| Identify this professional                                                                                                | Name                    |                          |                          |                          |
|                                                                                                                           | Telephone               |                          |                          |                          |
|                                                                                                                           | Email                   |                          |                          |                          |
|                                                                                                                           | Educational background: |                          |                          |                          |
| Notes                                                                                                                     |                         |                          |                          |                          |

| 3. COVID-19 contingency plan                                                                                                                                               |  | Completed                | In progress              | Not initiated            |
|----------------------------------------------------------------------------------------------------------------------------------------------------------------------------|--|--------------------------|--------------------------|--------------------------|
| There is a contingency plan in place that introduces mechanisms to protect the health of users, professionals, and potential visitors.                                     |  | <input type="checkbox"/> | <input type="checkbox"/> | <input type="checkbox"/> |
| A copy of the COVID-19 contingency plan is easily available at the facility and accessible by personnel.                                                                   |  | <input type="checkbox"/> | <input type="checkbox"/> | <input type="checkbox"/> |
| A COVID-19 information monitoring mechanism is available for continuously update of the contingency plan (for example, guidelines from the Directorate-General of Health). |  | <input type="checkbox"/> | <input type="checkbox"/> | <input type="checkbox"/> |
| The plan identifies the person(s) authorized to implement the plan and the management, monitoring and evaluation structure that will be used.                              |  | <input type="checkbox"/> | <input type="checkbox"/> | <input type="checkbox"/> |
| Notes                                                                                                                                                                      |  |                          |                          |                          |

| 4. Elements of a COVID-19 plan                                                                                                                                                                                      |           | Completed                | In progress              | Not initiated            |
|---------------------------------------------------------------------------------------------------------------------------------------------------------------------------------------------------------------------|-----------|--------------------------|--------------------------|--------------------------|
| 4.1. General                                                                                                                                                                                                        |           |                          |                          |                          |
| A person has been assigned responsibility for monitoring information set forth by the competent public health authorities and updating the COVID-19 response coordinator in the facility.                           |           | <input type="checkbox"/> | <input type="checkbox"/> | <input type="checkbox"/> |
| Identify this professional                                                                                                                                                                                          | Name      |                          |                          |                          |
|                                                                                                                                                                                                                     | Telephone |                          |                          |                          |
|                                                                                                                                                                                                                     | Email     |                          |                          |                          |
| The facility has a process for inter-facility transfers that includes notifying personnel and receiving facilities about a resident's suspected or confirmed diagnosis.                                             |           | <input type="checkbox"/> | <input type="checkbox"/> | <input type="checkbox"/> |
| The facility has a system for monitoring the evolution of COVID-19 among residents and personnel in the facility. Information from this monitoring system is used to implement prevention interventions.            |           | <input type="checkbox"/> | <input type="checkbox"/> | <input type="checkbox"/> |
| The facility has infection control policies that outline the precautions recommended to residents and personnel, including the dissemination of information and use of specific signs (e.g., posters and leaflets). |           | <input type="checkbox"/> | <input type="checkbox"/> | <input type="checkbox"/> |
| A mechanism for updating the COVID-19 response plan is well defined, including any deadlines.                                                                                                                       |           | <input type="checkbox"/> | <input type="checkbox"/> | <input type="checkbox"/> |
| Notes                                                                                                                                                                                                               |           |                          |                          |                          |
| 4.2. Outbreak capacity                                                                                                                                                                                              |           |                          |                          |                          |
| A contingency personnel plan has been developed that identifies the minimum personnel needs and prioritizes essential services based on residents' characteristics (e.g., functional limitations).                  |           | <input type="checkbox"/> | <input type="checkbox"/> | <input type="checkbox"/> |

| 4. Elements of a COVID-19 plan                                                                                                                                                        |             | Completed                | In progress                  | Not initiated            |
|---------------------------------------------------------------------------------------------------------------------------------------------------------------------------------------|-------------|--------------------------|------------------------------|--------------------------|
| A person has been assigned responsibility for a daily assessment and monitoring of personnel status and needs during a COVID-19 outbreak.                                             |             | <input type="checkbox"/> | <input type="checkbox"/>     | <input type="checkbox"/> |
| Identify this professional                                                                                                                                                            | Name        |                          |                              |                          |
|                                                                                                                                                                                       | Telephone   |                          |                              |                          |
|                                                                                                                                                                                       | Email       |                          |                              |                          |
| Estimates have been made of the quantities of materials and equipment that would be needed during a minimum four-week outbreak.                                                       |             | <input type="checkbox"/> | <input type="checkbox"/>     | <input type="checkbox"/> |
| A rationing strategy has been developed for Personal Protective Equipment (PPE), medicines and other scarce materials.                                                                |             | <input type="checkbox"/> | <input type="checkbox"/>     | <input type="checkbox"/> |
| A contingency plan has been developed for managing an increased need for postmortem care and disposition of deceased residents.                                                       |             | <input type="checkbox"/> | <input type="checkbox"/>     | <input type="checkbox"/> |
| An area in the facility that could be used as a temporary morgue has been identified.                                                                                                 |             | <input type="checkbox"/> | <input type="checkbox"/>     | <input type="checkbox"/> |
| Any plan for expanding the morgue capacity plan been discussed and decided with the competent authorities.                                                                            |             | <input type="checkbox"/> | <input type="checkbox"/>     | <input type="checkbox"/> |
| Notes                                                                                                                                                                                 |             |                          |                              |                          |
| 4.3. Communication                                                                                                                                                                    |             |                          |                              |                          |
| Key public health points of contact during the stages of the COVID-19 pandemic have been identified.                                                                                  |             | <input type="checkbox"/> | <input type="checkbox"/>     | <input type="checkbox"/> |
| Communication plans include how visitors should be informed about the importance of monitoring symptoms for 14 days after visiting the facility.                                      |             | <input type="checkbox"/> | <input type="checkbox"/>     | <input type="checkbox"/> |
| A person has been assigned responsibility for communications with personnel, residents and their families regarding the status, preparedness, and impact of COVID-19 in the facility. |             | <input type="checkbox"/> | <input type="checkbox"/>     | <input type="checkbox"/> |
| Contact information and communication channels for family members of facility residents are up to date and fully disseminated.                                                        |             | <input type="checkbox"/> | <input type="checkbox"/>     | <input type="checkbox"/> |
| Communication plans include how signs and other methods of communication will be used across the facility.                                                                            |             | <input type="checkbox"/> | <input type="checkbox"/>     | <input type="checkbox"/> |
| Notes                                                                                                                                                                                 |             |                          |                              |                          |
| 4.4. Supplies and resources                                                                                                                                                           |             |                          |                              |                          |
| A written and detailed plan for regular cleaning and disinfection of the facility has been developed.                                                                                 |             | <input type="checkbox"/> | <input type="checkbox"/>     | <input type="checkbox"/> |
| The cleaning and disinfection of the facility is ensured by a specialized company whenever confirmed cases are reported.                                                              |             | <input type="checkbox"/> | <input type="checkbox"/>     | <input type="checkbox"/> |
| The cleaning and disinfection products used at the facility adhere to recommended standards.                                                                                          |             | <input type="checkbox"/> | <input type="checkbox"/>     | <input type="checkbox"/> |
| Products in use                                                                                                                                                                       | 70% alcohol | <input type="checkbox"/> | Sodium hypochlorite (bleach) | <input type="checkbox"/> |

| 4. Elements of a COVID-19 plan                                                                                                                                                |                      | Completed                | In progress              | Not initiated            |
|-------------------------------------------------------------------------------------------------------------------------------------------------------------------------------|----------------------|--------------------------|--------------------------|--------------------------|
|                                                                                                                                                                               | Hydrogen peroxide    | <input type="checkbox"/> | List others, if any      |                          |
| All cleaning and disinfection products in use at the facility are well described in the cleaning and disinfection plan, and they are properly labeled, packaged, and stored.  |                      | <input type="checkbox"/> | <input type="checkbox"/> | <input type="checkbox"/> |
| The facility has access to disinfectant that is suitable for hospital use for cleaning the surfaces and equipments.                                                           |                      | <input type="checkbox"/> | <input type="checkbox"/> | <input type="checkbox"/> |
| A regular cleaning and disinfection plan for bedpans, urinals and toilet bowls for residents with suspected or confirmed infection has been included in the plan.             |                      | <input type="checkbox"/> | <input type="checkbox"/> | <input type="checkbox"/> |
| The cleaning and disinfection of the most frequently used surfaces (e.g., tables and chairs) has been included in the plan.                                                   |                      | <input type="checkbox"/> | <input type="checkbox"/> | <input type="checkbox"/> |
| The cleaning and disinfection of shared equipment (e.g., thermometers) has been included in the plan.                                                                         |                      | <input type="checkbox"/> | <input type="checkbox"/> | <input type="checkbox"/> |
| The cleaning and washing of potentially contaminated clothing has been included in the plan (40°C for heat sensitive and 60°C for heat resistant).                            |                      | <input type="checkbox"/> | <input type="checkbox"/> | <input type="checkbox"/> |
| A procedure has been developed for personnel to remove their work clothes after the workday.                                                                                  |                      | <input type="checkbox"/> | <input type="checkbox"/> | <input type="checkbox"/> |
| <ul style="list-style-type: none"> <li>Describe the pathway and procedures</li> </ul>                                                                                         |                      |                          |                          |                          |
| Cleaning plan includes a process for waste disposal, including personal protective equipment (PPE) and diapers (biohazard waste).                                             |                      | <input type="checkbox"/> | <input type="checkbox"/> | <input type="checkbox"/> |
| <ul style="list-style-type: none"> <li>Describe the process of waste disposal</li> </ul>                                                                                      |                      |                          |                          |                          |
| Alcohol-based hand sanitizer for hand hygiene is available in every resident room (inside and out), other common areas and hallways.                                          |                      | <input type="checkbox"/> | <input type="checkbox"/> | <input type="checkbox"/> |
| Sinks are well-stocked with soap and paper towels for hand washing.                                                                                                           |                      | <input type="checkbox"/> | <input type="checkbox"/> | <input type="checkbox"/> |
| Signs about procedures to prevent the dissemination of infection are available throughout the facility (e.g. respiratory etiquette, hand washing, air renewal every 6 hours). |                      | <input type="checkbox"/> | <input type="checkbox"/> | <input type="checkbox"/> |
| The facility provides tissues and facemasks for coughing people (residents and personnel) in common areas with no-touch receptacles for disposal.                             |                      | <input type="checkbox"/> | <input type="checkbox"/> | <input type="checkbox"/> |
| Necessary personal protective equipment (PPE) is available outside of the resident room and in other areas where resident care is provided.                                   |                      | <input type="checkbox"/> | <input type="checkbox"/> | <input type="checkbox"/> |
| PPE availability<br><br>List others, if any:                                                                                                                                  | Gowns                | <input type="checkbox"/> | Surgical mask            | <input type="checkbox"/> |
|                                                                                                                                                                               | Glasses/Face shields | <input type="checkbox"/> | Cloth masks              | <input type="checkbox"/> |
|                                                                                                                                                                               | Gloves               | <input type="checkbox"/> | FPP2/FPP3 masks          | <input type="checkbox"/> |
|                                                                                                                                                                               | Cap                  | <input type="checkbox"/> | Cover boots              | <input type="checkbox"/> |
| The facility has a process to monitor supply levels (e.g. PPE and disinfectant products).                                                                                     |                      | <input type="checkbox"/> | <input type="checkbox"/> | <input type="checkbox"/> |

| 4. Elements of a COVID-19 plan                                                                                                                                        |  | Completed                | In progress              | Not initiated            |
|-----------------------------------------------------------------------------------------------------------------------------------------------------------------------|--|--------------------------|--------------------------|--------------------------|
| The facility has ensured in the contingency plan processes that could be triggered when they experience supply shortages (PPE and disinfectant products).             |  | <input type="checkbox"/> | <input type="checkbox"/> | <input type="checkbox"/> |
| Notes                                                                                                                                                                 |  |                          |                          |                          |
| 4.5. Education and training                                                                                                                                           |  |                          |                          |                          |
| A person has been designated with responsibility for coordinating education and training on COVID-19.                                                                 |  | <input type="checkbox"/> | <input type="checkbox"/> | <input type="checkbox"/> |
| An education and training plan has been developed to prevent new cases of coronavirus infection; the target population of this education and training plan are:       |  |                          |                          |                          |
| ▪ the facility's personnel                                                                                                                                            |  | <input type="checkbox"/> | <input type="checkbox"/> | <input type="checkbox"/> |
| ▪ the facility's external collaborators                                                                                                                               |  | <input type="checkbox"/> | <input type="checkbox"/> | <input type="checkbox"/> |
| ▪ the new staff hired to bolster the facility's personnel                                                                                                             |  | <input type="checkbox"/> | <input type="checkbox"/> | <input type="checkbox"/> |
| ▪ the volunteers                                                                                                                                                      |  | <input type="checkbox"/> | <input type="checkbox"/> | <input type="checkbox"/> |
| ▪ the health professionals at the facility                                                                                                                            |  | <input type="checkbox"/> | <input type="checkbox"/> | <input type="checkbox"/> |
| ▪ the residents                                                                                                                                                       |  | <input type="checkbox"/> | <input type="checkbox"/> | <input type="checkbox"/> |
| ▪ the family members and visitors                                                                                                                                     |  | <input type="checkbox"/> | <input type="checkbox"/> | <input type="checkbox"/> |
| Any training and awareness materials have been developed taking into consideration the characteristics of the target audience (e.g., reading-level, health literacy). |  | <input type="checkbox"/> | <input type="checkbox"/> | <input type="checkbox"/> |
| The facility keeps a record of all education and training activities related with the adequate use of personal protective equipment (PPE).                            |  | <input type="checkbox"/> | <input type="checkbox"/> | <input type="checkbox"/> |
| Notes                                                                                                                                                                 |  |                          |                          |                          |
| 4.6. Occupational health                                                                                                                                              |  |                          |                          |                          |
| The facility has sick leave policies that are non-punitive and consistent with public health policies that allow personnel to stay home in case of need.              |  | <input type="checkbox"/> | <input type="checkbox"/> | <input type="checkbox"/> |
| Notes                                                                                                                                                                 |  |                          |                          |                          |
| The facility has developed a plan for the distribution and rotation of work schedules among personnel (e.g. 14-day at work rotation).                                 |  | <input type="checkbox"/> | <input type="checkbox"/> | <input type="checkbox"/> |
| Notes                                                                                                                                                                 |  |                          |                          |                          |
| The facility instructs the personnel to regularly monitor themselves for any symptoms related with coronavirus infection                                              |  | <input type="checkbox"/> | <input type="checkbox"/> | <input type="checkbox"/> |
| Notes                                                                                                                                                                 |  |                          |                          |                          |
| The facility has a process to actively screen residents and their family members/visitors for any symptoms related with coronavirus infection.                        |  | <input type="checkbox"/> | <input type="checkbox"/> | <input type="checkbox"/> |
| Notes                                                                                                                                                                 |  |                          |                          |                          |

| 4. Elements of a COVID-19 plan                                                                                                                                     |  | Completed                | In progress              | Not initiated            |
|--------------------------------------------------------------------------------------------------------------------------------------------------------------------|--|--------------------------|--------------------------|--------------------------|
| The facility has a process for actively screen personnel for symptoms of a coronavirus infection when they report to work.                                         |  | <input type="checkbox"/> | <input type="checkbox"/> | <input type="checkbox"/> |
| Notes                                                                                                                                                              |  |                          |                          |                          |
| The facility has a process for actively screen personnel for symptoms of a coronavirus infection at the end of the workday.                                        |  | <input type="checkbox"/> | <input type="checkbox"/> | <input type="checkbox"/> |
| Notes                                                                                                                                                              |  |                          |                          |                          |
| The personnel was involved in decision-making on matters that directly or indirectly affect their routine practice, and the regular work processes and procedures. |  | <input type="checkbox"/> | <input type="checkbox"/> | <input type="checkbox"/> |
| Notes                                                                                                                                                              |  |                          |                          |                          |
| The facility has a process to monitor the implementation and the effects of measures implemented in the facility to prevent potential contagion situations.        |  | <input type="checkbox"/> | <input type="checkbox"/> | <input type="checkbox"/> |
| Notes                                                                                                                                                              |  |                          |                          |                          |
| The measures in force in the facility imply:                                                                                                                       |  |                          |                          |                          |
| <ul style="list-style-type: none"> <li>that common spaces are only used by residents and personnel without symptoms of (acute) respiratory infection.</li> </ul>   |  | <input type="checkbox"/> | <input type="checkbox"/> | <input type="checkbox"/> |
| <ul style="list-style-type: none"> <li>a physical distance of at least 1.5 meters between people.</li> </ul>                                                       |  | <input type="checkbox"/> | <input type="checkbox"/> | <input type="checkbox"/> |
| <ul style="list-style-type: none"> <li>the use of common spaces to be done in shifts, including meal periods.</li> </ul>                                           |  | <input type="checkbox"/> | <input type="checkbox"/> | <input type="checkbox"/> |
| <ul style="list-style-type: none"> <li>the provision of beds spaced at least 1.5 meters apart.</li> </ul>                                                          |  | <input type="checkbox"/> | <input type="checkbox"/> | <input type="checkbox"/> |
| <ul style="list-style-type: none"> <li>that suspected COVID-19 cases do not share the same space of confirmed cases.</li> </ul>                                    |  | <input type="checkbox"/> | <input type="checkbox"/> | <input type="checkbox"/> |
| <ul style="list-style-type: none"> <li>that suspected or confirmed COVID-19 cases do not share common spaces with fellow residents and personnel.</li> </ul>       |  | <input type="checkbox"/> | <input type="checkbox"/> | <input type="checkbox"/> |
| <ul style="list-style-type: none"> <li>the possibility of transferring residents to other facilities (e.g. hotel).</li> </ul>                                      |  | <input type="checkbox"/> | <input type="checkbox"/> | <input type="checkbox"/> |
| <ul style="list-style-type: none"> <li>restriction or cancellation of group activities.</li> </ul>                                                                 |  | <input type="checkbox"/> | <input type="checkbox"/> | <input type="checkbox"/> |
| <ul style="list-style-type: none"> <li>the provision of means of contact so that residents can communicate with family members.</li> </ul>                         |  | <input type="checkbox"/> | <input type="checkbox"/> | <input type="checkbox"/> |
| <ul style="list-style-type: none"> <li>List others, if any:</li> </ul>                                                                                             |  | <input type="checkbox"/> | <input type="checkbox"/> | <input type="checkbox"/> |
| Notes                                                                                                                                                              |  |                          |                          |                          |
| 4.7. Identification and management of ill residents                                                                                                                |  |                          |                          |                          |
| The facility has developed a plan for isolating suspected or confirmed cases of coronavirus infection.                                                             |  | <input type="checkbox"/> | <input type="checkbox"/> | <input type="checkbox"/> |
| The plan includes the processes and procedures on how to immediately notify the competent authorities on suspected cases of coronavirus infection.                 |  | <input type="checkbox"/> | <input type="checkbox"/> | <input type="checkbox"/> |
| The admission process for new residents has been revised and requires:                                                                                             |  |                          |                          |                          |

| 4. Elements of a COVID-19 plan                                                                                                                                                                    |                          | Completed                | In progress              | Not initiated |
|---------------------------------------------------------------------------------------------------------------------------------------------------------------------------------------------------|--------------------------|--------------------------|--------------------------|---------------|
| ▪ a negative laboratory test for SARS-CoV-2.                                                                                                                                                      | <input type="checkbox"/> | <input type="checkbox"/> | <input type="checkbox"/> |               |
| ▪ that all new residents show no signs and symptoms of respiratory infection.                                                                                                                     | <input type="checkbox"/> | <input type="checkbox"/> | <input type="checkbox"/> |               |
| ▪ a mandatory isolation period of 14 days (minimum).                                                                                                                                              | <input type="checkbox"/> | <input type="checkbox"/> | <input type="checkbox"/> |               |
| The facility has developed a plan for when a resident leaves the institution for less than 24 hours (e.g. isolation period of at least 14 days).                                                  | <input type="checkbox"/> | <input type="checkbox"/> | <input type="checkbox"/> |               |
| The facility has developed a plan for when a resident leaves the institution for more than 24 hours (e.g. laboratory test for SARS-CoV-2).                                                        | <input type="checkbox"/> | <input type="checkbox"/> | <input type="checkbox"/> |               |
| Notes                                                                                                                                                                                             |                          |                          |                          |               |
| <b>4.8. Access control</b>                                                                                                                                                                        |                          |                          |                          |               |
| The institution has developed or used materials at all entrances to signal access restriction to the facility to all individuals with febrile symptoms or with symptoms of respiratory infection. | <input type="checkbox"/> | <input type="checkbox"/> | <input type="checkbox"/> |               |
| The facility has developed a plan for non-essential visits and where potential restrictions apply, those affected were informed                                                                   | <input type="checkbox"/> | <input type="checkbox"/> | <input type="checkbox"/> |               |
| The facility has developed a plan to handle supplier that:                                                                                                                                        |                          |                          |                          |               |
| ▪ require access to the interior of the facility.                                                                                                                                                 | <input type="checkbox"/> | <input type="checkbox"/> | <input type="checkbox"/> |               |
| ▪ do not require access to the interior of the facility, and thus, a (un)loading area was defined outside the facility.                                                                           | <input type="checkbox"/> | <input type="checkbox"/> | <input type="checkbox"/> |               |
| Notes                                                                                                                                                                                             |                          |                          |                          |               |

|                                                                                                                                                                                                                                                            |
|------------------------------------------------------------------------------------------------------------------------------------------------------------------------------------------------------------------------------------------------------------|
| <p><b>5. Are there items that you would like to have implemented in the institution, but that due to the difficulty in gathering reliable information, access to adequate training, or availability of resources was not possible? If so, specify.</b></p> |
| <p><b>6. Other comments</b></p>                                                                                                                                                                                                                            |

Thank you for collaborating. We are at your service.
