# Supplementary material for: COVID-19 Preparedness and Perceived Safety in 138 Nursing Homes in Southern Portugal: A Cross-sectional Survey-based Study in the Initial Phases of the Pandemic
Source: Preprints.org preprint supplement (doi:10.20944/preprints202106.0255.v1), 2021-06-09
Supplement: Supplementary file 13 [file supplementary]

## Supplementary File 2

| Nursing home COVID-19 preparedness checklist                                                                                                                                                                          |  |              |                                                                                |             |  |
|-----------------------------------------------------------------------------------------------------------------------------------------------------------------------------------------------------------------------|--|--------------|--------------------------------------------------------------------------------|-------------|--|
| Follow-up conversation note taking template                                                                                                                                                                           |  |              |                                                                                |             |  |
| <b>1. Institution</b>                                                                                                                                                                                                 |  |              |                                                                                |             |  |
| Name                                                                                                                                                                                                                  |  | COVID 70+ ID |                                                                                | Start (h:m) |  |
| Institution's representative                                                                                                                                                                                          |  | Date         |                                                                                | End (h:m)   |  |
| COVID 70+ representative                                                                                                                                                                                              |  |              |                                                                                |             |  |
| <b>NOTES</b>                                                                                                                                                                                                          |  |              |                                                                                |             |  |
| (The notes should focus on the aspects of each of the areas covered in checklist and provide additional information on the difficulties in implementing measures, diagnosis of current needs and potential solutions) |  |              |                                                                                |             |  |
| <b>1. Personnel structure</b>                                                                                                                                                                                         |  |              |                                                                                |             |  |
| <b>Management</b><br>(e.g. unit directors, coordinators)                                                                                                                                                              |  |              | <b>Medical staff</b>                                                           |             |  |
| <b>Administrative support</b><br>(e.g. human resources, secretariat)                                                                                                                                                  |  |              | <b>Nursing staff</b>                                                           |             |  |
| <b>General support</b><br>(e.g. drivers, maintenance, security)                                                                                                                                                       |  |              | <b>Health care assistants</b>                                                  |             |  |
| <b>Others</b>                                                                                                                                                                                                         |  |              | <b>Other care providers</b><br>(e.g. nutritionist, therapists, social support) |             |  |
| <b>General remarks</b>                                                                                                                                                                                                |  |              |                                                                                |             |  |
| <b>2. Structure for planning and decision making</b>                                                                                                                                                                  |  |              |                                                                                |             |  |
|                                                                                                                                                                                                                       |  |              |                                                                                |             |  |
| <b>3. COVID-19 contingency plan</b>                                                                                                                                                                                   |  |              |                                                                                |             |  |
|                                                                                                                                                                                                                       |  |              |                                                                                |             |  |
| <b>4. Elements of a COVID-19 plan</b>                                                                                                                                                                                 |  |              |                                                                                |             |  |
| <b>4.1. General</b>                                                                                                                                                                                                   |  |              |                                                                                |             |  |
| <b>4.2. Outbreak capacity</b>                                                                                                                                                                                         |  |              |                                                                                |             |  |
| <b>4.3. Communication</b>                                                                                                                                                                                             |  |              |                                                                                |             |  |
| <b>4.4. Supplies and resources</b>                                                                                                                                                                                    |  |              |                                                                                |             |  |
| <b>4.5. Education and training</b>                                                                                                                                                                                    |  |              |                                                                                |             |  |
| <b>4.6. Occupational health</b>                                                                                                                                                                                       |  |              |                                                                                |             |  |
| <b>4.7. Identification and management of ill residents</b>                                                                                                                                                            |  |              |                                                                                |             |  |
| <b>4.8. Access control</b>                                                                                                                                                                                            |  |              |                                                                                |             |  |
| <b>5. Identification of rapid implementation measures and respective prioritization given the characteristics of the facility.</b>                                                                                    |  |              |                                                                                |             |  |
| <b>6. Further comments from the COVID 70+ project representative</b>                                                                                                                                                  |  |              |                                                                                |             |  |
