# Supplementary material for: COVID-19 Preparedness and Perceived Safety in 138 Nursing Homes in Southern Portugal: A Cross-sectional Survey-based Study in the Initial Phases of the Pandemic
Source: Preprints.org preprint supplement (doi:10.20944/preprints202106.0255.v1), 2021-06-09
Supplement: Supplementary file 14 [file supplementary]

## Supplementary File 8

**Algarve:** Nursing home resident safety culture percent positive, negative, and neutral scores (Individual items and composite scores).

|                                         |                                                                              | Percent <b>positive</b><br>response to item | Percent <b>negative</b><br>response to item | Percent <b>neutral</b> response<br>to item |                                                                                     |
|-----------------------------------------|------------------------------------------------------------------------------|---------------------------------------------|---------------------------------------------|--------------------------------------------|-------------------------------------------------------------------------------------|
| <b>Teamwork</b>                         |                                                                              | <b>78%</b>                                  | <b>6%</b>                                   | <b>16%</b>                                 | Average percent<br>positive/negative/neutral response across<br>the composite items |
| A1                                      | Staff in this nursing home treat each other with respect                     | 81%                                         | 4%                                          | 15%                                        |                                                                                     |
| A2                                      | Staff support one another in this nursing home                               | 75%                                         | 6%                                          | 18%                                        |                                                                                     |
| A5                                      | Staff feel like they are part of a team                                      | 80%                                         | 6%                                          | 14%                                        |                                                                                     |
| A9                                      | When someone gets really busy in this nursing home, other staff help out     | 75%                                         | 9%                                          | 16%                                        |                                                                                     |
| <b>Staffing</b>                         |                                                                              | <b>61%</b>                                  | <b>22%</b>                                  | <b>17%</b>                                 | Average percent<br>positive/negative/neutral response across<br>the composite items |
| A3                                      | We have enough staff to handle the workload                                  | 55%                                         | 26%                                         | 19%                                        |                                                                                     |
| A8 R                                    | Staff have to hurry because they have too much work to do                    | 33%                                         | 45%                                         | 22%                                        |                                                                                     |
| A16                                     | Residents' needs are met during shift                                        | 89%                                         | 2%                                          | 9%                                         |                                                                                     |
| A17 R                                   | It is hard to keep residents safe here because so many staff quit their jobs | 68%                                         | 16%                                         | 16%                                        |                                                                                     |
| <b>Compliance with procedures</b>       |                                                                              | <b>52%</b>                                  | <b>29%</b>                                  | <b>19%</b>                                 | Average percent<br>positive/negative/neutral response across<br>the composite items |
| A4                                      | Staff follow standard procedures to care for residents                       | 85%                                         | 5%                                          | 10%                                        |                                                                                     |
| A6 R                                    | Staff use shortcuts to get their work done faster                            | 15%                                         | 59%                                         | 26%                                        |                                                                                     |
| A14 R                                   | To make work easier, staff often ignore procedures                           | 56%                                         | 24%                                         | 20%                                        |                                                                                     |
| <b>Training and skills</b>              |                                                                              | <b>68%</b>                                  | <b>13%</b>                                  | <b>19%</b>                                 | Average percent<br>positive/negative/neutral response across<br>the composite items |
| A7                                      | Staff get the training they need in this nursing home                        | 71%                                         | 10%                                         | 20%                                        |                                                                                     |
| A11                                     | Staff have enough training on how to handle difficult residents              | 55%                                         | 22%                                         | 23%                                        |                                                                                     |
| A13                                     | Staff understand the training they get in this nursing home                  | 79%                                         | 6%                                          | 15%                                        |                                                                                     |
| <b>Nonpunitive response to mistakes</b> |                                                                              | <b>55%</b>                                  | <b>21%</b>                                  | <b>24%</b>                                 | Average percent<br>positive/negative/neutral response across<br>the composite items |
| A10 R                                   | Staff are blamed when a resident is harmed                                   | 45%                                         | 25%                                         | 30%                                        |                                                                                     |
| A12 R                                   | Staff are afraid to report their mistakes                                    | 47%                                         | 31%                                         | 22%                                        |                                                                                     |
| A15                                     | Staff are treated fairly when they make                                      | 61%                                         | 14%                                         | 25%                                        |                                                                                     |
| A18                                     | Staff feel safe reporting their mistakes                                     | 66%                                         | 12%                                         | 22%                                        |                                                                                     |

**Alentejo:** Nursing home resident safety culture percent positive, negative, and neutral scores (Individual items and composite scores).

|                                         |                                                                              | Percent <b>positive</b><br>response to item | Percent <b>negative</b><br>response to item | Percent <b>neutral</b><br>response to item |                                                                               |
|-----------------------------------------|------------------------------------------------------------------------------|---------------------------------------------|---------------------------------------------|--------------------------------------------|-------------------------------------------------------------------------------|
| <b>Teamwork</b>                         |                                                                              | <b>79%</b>                                  | <b>6%</b>                                   | <b>15%</b>                                 | Average percent positive/negative/neutral response across the composite items |
| A1                                      | Staff in this nursing home treat each other with respect                     | 84%                                         | 4%                                          | 12%                                        |                                                                               |
| A2                                      | Staff support one another in this nursing home                               | 78%                                         | 5%                                          | 17%                                        |                                                                               |
| A5                                      | Staff feel like they are part of a team                                      | 81%                                         | 6%                                          | 13%                                        |                                                                               |
| A9                                      | When someone gets really busy in this nursing home, other staff help out     | 72%                                         | 9%                                          | 19%                                        |                                                                               |
| <b>Staffing</b>                         |                                                                              | <b>59%</b>                                  | <b>22%</b>                                  | <b>19%</b>                                 | Average percent positive/negative/neutral response across the composite items |
| A3                                      | We have enough staff to handle the workload                                  | 56%                                         | 24%                                         | 20%                                        |                                                                               |
| A8 R                                    | Staff have to hurry because they have too much work to do                    | 29%                                         | 47%                                         | 24%                                        |                                                                               |
| A16                                     | Residents' needs are met during shift                                        | 86%                                         | 3%                                          | 11%                                        |                                                                               |
| A17 R                                   | It is hard to keep residents safe here because so many staff quit their jobs | 67%                                         | 12%                                         | 21%                                        |                                                                               |
| <b>Compliance with procedures</b>       |                                                                              | <b>49%</b>                                  | <b>33%</b>                                  | <b>18%</b>                                 | Average percent positive/negative/neutral response across the composite items |
| A4                                      | Staff follow standard procedures to care for residents                       | 85%                                         | 5%                                          | 10%                                        |                                                                               |
| A6 R                                    | Staff use shortcuts to get their work done faster                            | 11%                                         | 66%                                         | 23%                                        |                                                                               |
| A14 R                                   | To make work easier, staff often ignore procedures                           | 51%                                         | 27%                                         | 22%                                        |                                                                               |
| <b>Training and skills</b>              |                                                                              | <b>72%</b>                                  | <b>10%</b>                                  | <b>18%</b>                                 | Average percent positive/negative/neutral response across the composite items |
| A7                                      | Staff get the training they need in this nursing home                        | 76%                                         | 8%                                          | 16%                                        |                                                                               |
| A11                                     | Staff have enough training on how to handle difficult residents              | 61%                                         | 19%                                         | 20%                                        |                                                                               |
| A13                                     | Staff understand the training they get in this nursing home                  | 78%                                         | 5%                                          | 17%                                        |                                                                               |
| <b>Nonpunitive response to mistakes</b> |                                                                              | <b>55%</b>                                  | <b>18%</b>                                  | <b>27%</b>                                 | Average percent positive/negative/neutral response across the composite items |
| A10 R                                   | Staff are blamed when a resident is harmed                                   | 50%                                         | 23%                                         | 27%                                        |                                                                               |
| A12 R                                   | Staff are afraid to report their mistakes                                    | 43%                                         | 30%                                         | 27%                                        |                                                                               |
| A15                                     | Staff are treated fairly when they make                                      | 64%                                         | 10%                                         | 26%                                        |                                                                               |
| A18                                     | Staff feel safe reporting their mistakes                                     | 63%                                         | 9%                                          | 28%                                        |                                                                               |
