# Supplementary material for: COVID-19 Preparedness and Perceived Safety in 138 Nursing Homes in Southern Portugal: A Cross-sectional Survey-based Study in the Initial Phases of the Pandemic
Source: Preprints.org preprint supplement (doi:10.20944/preprints202106.0255.v1), 2021-06-09
Supplement: Supplementary file 15 [file supplementary]

## Supplementary File 7

Key areas where respondents felt a need for support from others: proportion comparison between Algarve and Alentejo.

| Item                                         | Algarve | Alentejo | IRR<br>(95% CI)          | p-value |
|----------------------------------------------|---------|----------|--------------------------|---------|
| I do not feel a need for support from others | 1:4     | 1:4      | 1.139<br>(0.845 – 1.541) | 0.380   |
| Dealing with my own negative mood            | 1:9     | 1:13     | 1.433<br>(0.851 – 2.469) | 0.156   |
| Dealing with stress                          | 1:3     | 1:3      | 0.833<br>(0.644 – 1.080) | 0.153   |
| Dealing with fear/anxiety                    | 1:4     | 1:3      | 0.713<br>(0.537 – 0.944) | 0.014   |
| Dealing with the emotions of others          | 1:5     | 1:6      | 1.053<br>(0.736 – 1.513) | 0.770   |
| Occupying myself with other activities       | 1:6     | 1:10     | 1.527<br>(0.987 – 2.403) | 0.047   |
| Sleeping                                     | 1:4     | 1:4      | 1.131<br>(0.833 – 1.541) | 0.415   |
| Dealing with grief                           | 1:17    | 1:27     | 1.533<br>(0.732 – 3.381) | 0.227   |
| Psychological support                        | 1:67    | 1:25     | 0.369<br>(0.115 – 1.041) | 0.035   |

IRR: Incidence rate ratio. CI: Confidence interval.
